# Supplementary material
Source: Research Square preprint supplement (doi:10.21203/rs.3.rs-9903113/v1)

**Engineering High-Performance Reactive Hot-Melt Polyurethanes: The Role of Chain Extenders in Modulating Polyester Polyols Properties**

Arash Dehghanian1 and Kurosh Rad-Moghadam1,*

1Faculty of Chemistry, University of Guilan, Namjoo Street, Rasht 41938-33697, Iran. E-mail: [radmm@guilan.ac.ir](mailto:radmm@guilan.ac.ir)

**Table of contents**

| **Figure S1.** 1H NMR spectrum of PSPO-1 |
| --- |
| **Figure S2.** 1H NMR spectrum of PSPO-2 |
| **Figure S3.** 1H NMR spectrum of PSPO-3 |
| **Figure S4.** ATR FT-IR spectrum of PSPO-1 |
| **Figure S5.** ATR FT-IR spectrum of PSPO-2 |
| **Figure S6.** ATR FT-IR spectrum of PSPO-3 |
| **Figure S7.** GPC chromatogram of PSPO-1 |
| **Figure S8.** GPC chromatogram of PSPO-2 |
| **Figure S9.** GPC chromatogram of PSPO-3 |
| **Figure S10.** DSC thermogram of PSPO-1 |
| **Figure S11.** DSC thermogram of PSPO-2 |
| **Figure S12.** DSC thermogram of PSPO-3 |
| **Figure S13.** DSC thermogram of HMPUR derived from PSPO-1 & MDI & EDA |
| **Figure S14.** DSC thermogram of HMPUR derived from PSPO-1 & MDI & BDO |
| **Figure S15.** DSC thermogram of HMPUR derived from PSPO-2 & MDI & EDA |
| **Figure S16.** DSC thermogram of HMPUR derived from PSPO-2 & MDI & BDO |
| **Figure S17.** DSC thermogram of HMPUR derived from PSPO-3 & MDI & EDA |
| **Figure S18.** DSC thermogram of HMPUR derived from PSPO-3 & MDI & BDO |
| **Figure S19.** Table of viscosities for the synthesized HMPURs |
| **Figure S20.** Lab shear diagram of HMPUR derived from PSPO-1 & MDI & EDA |
| **Figure S21.** Lab shear diagram of HMPUR derived from PSPO-1 & MDI & BDO |
| **Figure S22.** Lab shear diagram of HMPUR derived from PSPO-2 & MDI & EDA |
| **Figure S23.** Lab shear diagram of HMPUR derived from PSPO-2 & MDI & BDO |
| **Figure S24.** Lab shear diagram of HMPUR derived from PSPO-3 & MDI & EDA |
| **Figure S25.** Lab shear diagram of HMPUR derived from PSPO-3 & MDI & BDO |
| **Figure S26.** FT-IR spectrum of HMPUR derived from PSPO-3 & MDI & EDA |
| **Figure S27.** FT-IR spectrum of HMPUR derived from PSPO-3 & MDI & BDO |

**Figure S1.** 1H NMR spectrum of PSPO-1

**Figure S2.** 1H NMR spectrum of PSPO-2

**Figure S3.** 1H NMR spectrum of PSPO-3

**Figure S4.** FT-IR spectrum of PSPO-1 in KBr wafer


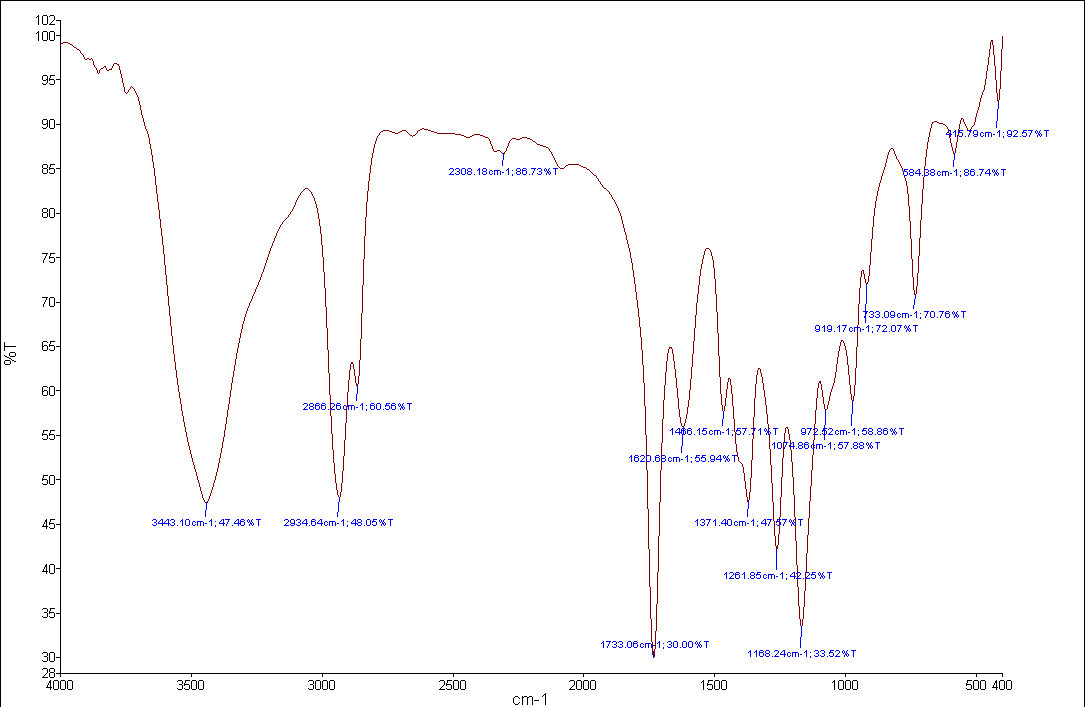


**Figure S5.**  FT-IR spectrum of PSPO-2 in KBr wafer


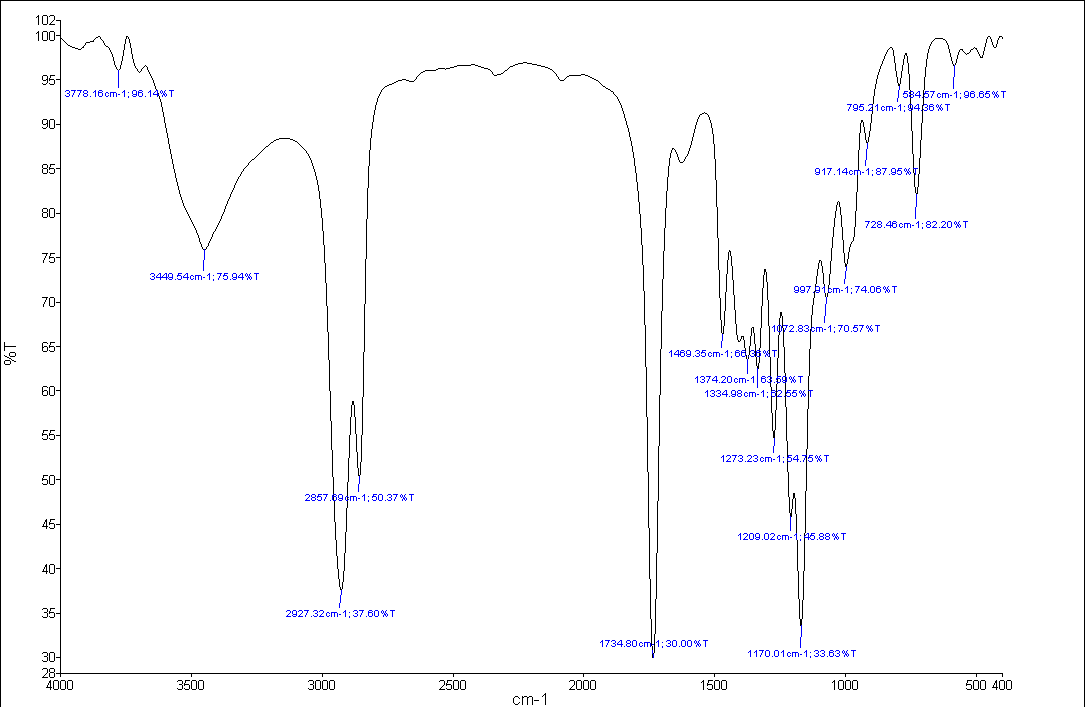


**Figure S6.**  FT-IR spectrum of PSPO-3 in KBr wafer


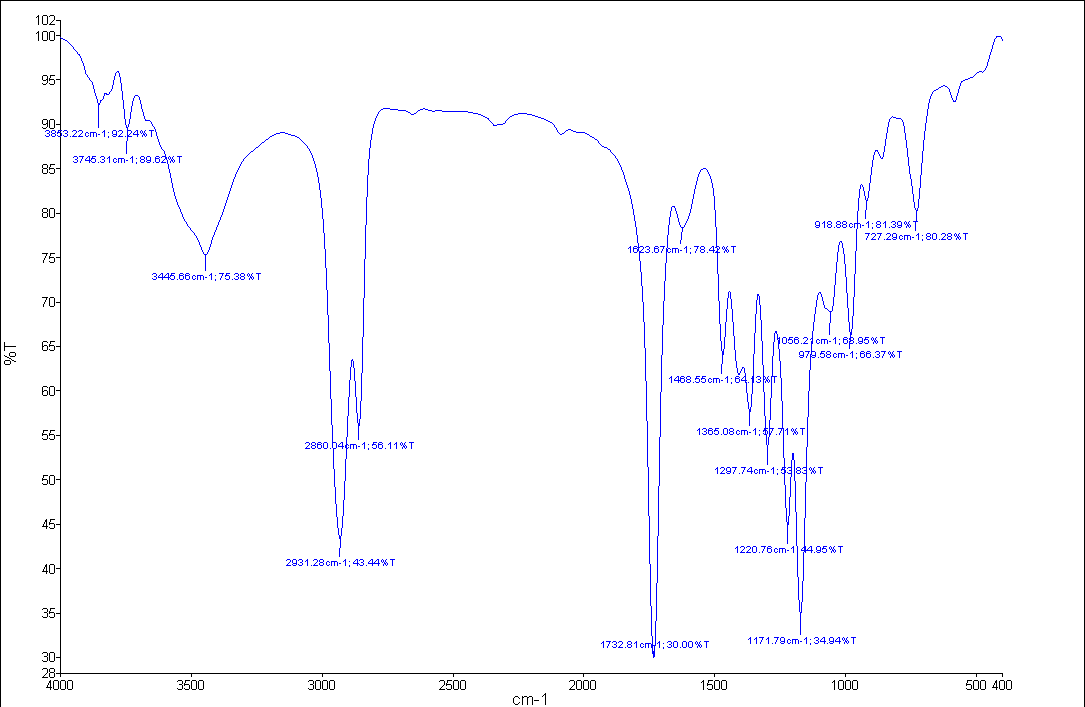


**Figure S7.**  GPC chromatogram of PSPO-1

**Figure S8.**  GPC chromatogram of PSPO-2

**Figure S9.**  GPC chromatogram of PSPO-3

**Figure S10.**  DSC thermogram of PSPO-1

**Figure S11.**  DSC thermogram of PSPO-2

**Figure S12.**  DSC thermogram of PSPO-3

**Figure S13.** DSC thermogram of HMPUR derived from PSPO-1 & MDI & EDA


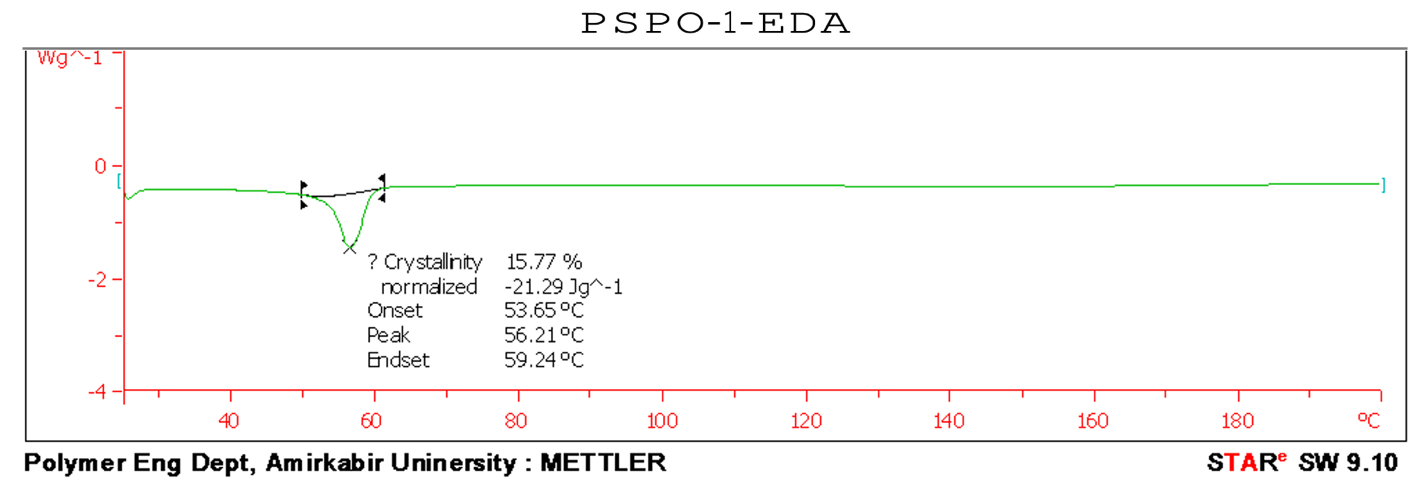


**Figure S14.** DSC thermogram of HMPUR derived from PSPO-1 & MDI & BDO


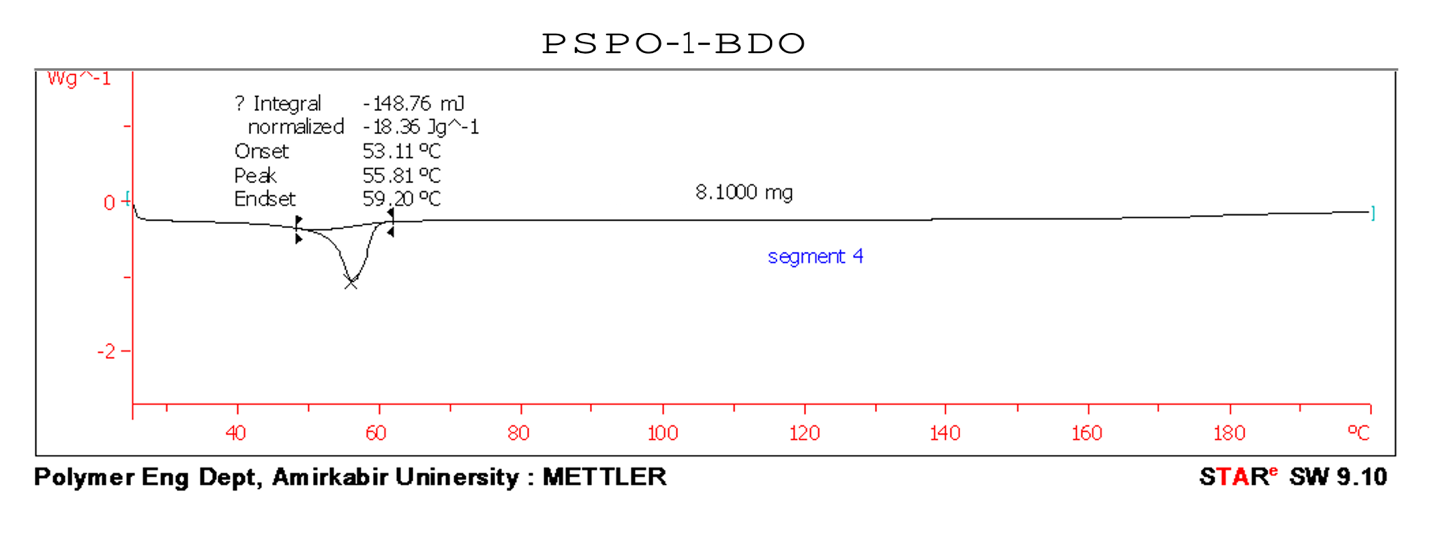


**Figure S15.** DSC thermogram of HMPUR derived from PSPO-2 & MDI & EDA


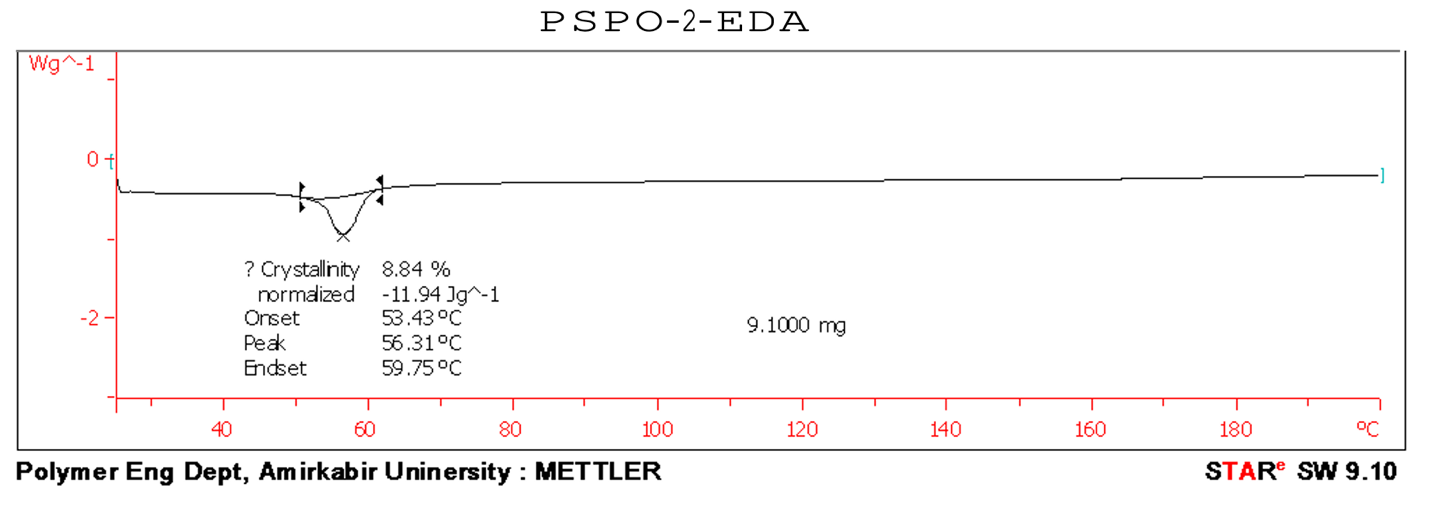


**Figure S16.** DSC thermogram of HMPUR derived from PSPO-2 & MDI & BDO


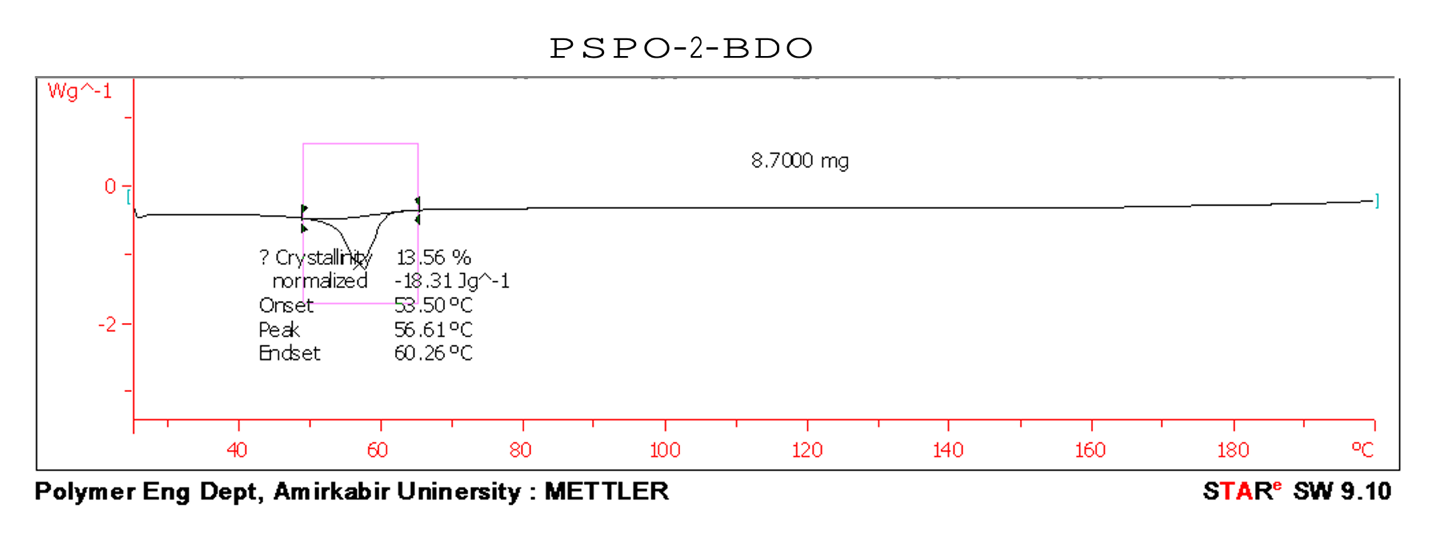


**Figure S17.** DSC thermogram of HMPUR derived from PSPO-3 & MDI & EDA


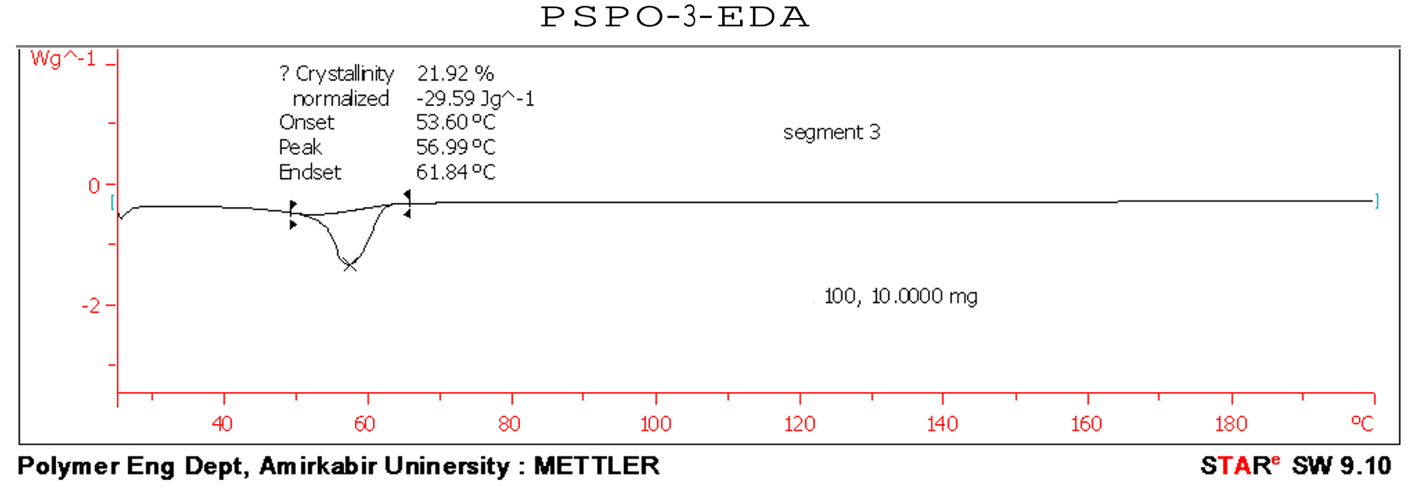


**Figure S18.** DSC thermogram of HMPUR derived from PSPO-2 & MDI & BDO


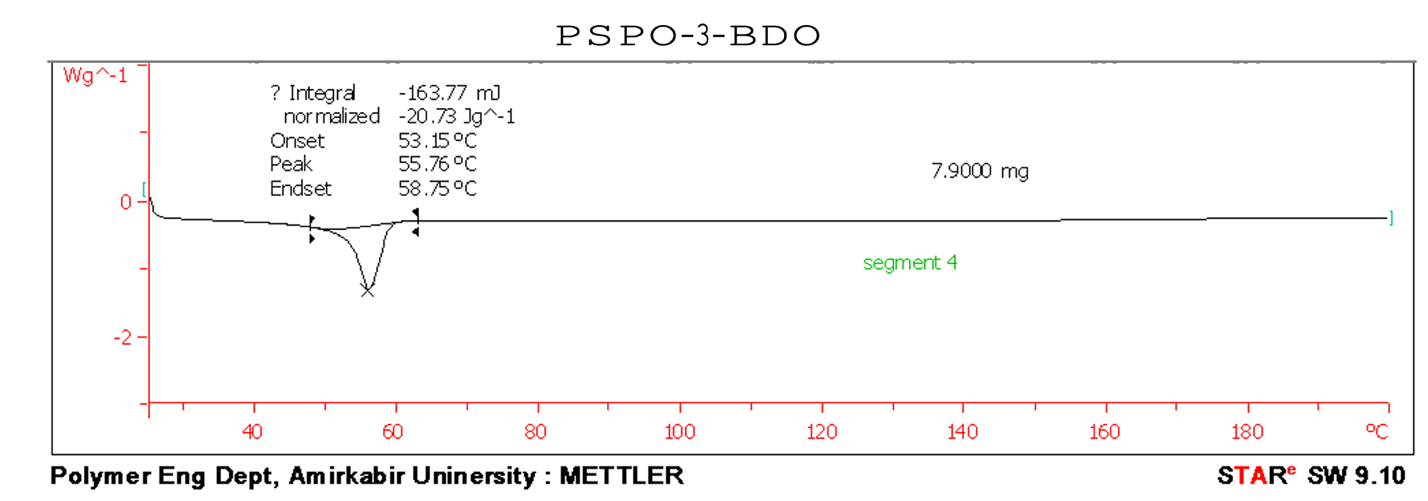


**Figure S19.** Table of viscosities for the synthesized HMPURs

| **Sample. No** | **viscosity@ 90 0C** | **viscosity@ 100 0C** | **viscosity@ 110 0C** | **viscosity@ 120 0C** | **viscosity@ 130 0C** | **viscosity@ 140 0C** |
| --- | --- | --- | --- | --- | --- | --- |
| RSPO1-DBO | 6850 | 5100 | 4050 | 3100 | 2320 | 1980 |
| RSPO1-EDA | 6900 | 5080 | 3940 | 2820 | 2170 | 2210 |
| RSPO2-DBO | 7960 | 5940 | 4870 | 3860 | 2940 | 2680 |
| RSPO2-EDA | 8480 | 6870 | 5150 | 4100 | 3170 | 2750 |
| RSPO3-DBO | 9650 | 7230 | 5750 | 4250 | 3480 | 2890 |

**Figure S20.** Lab shear diagram of HMPUR derived from PSPO-1 & MDI & EDA


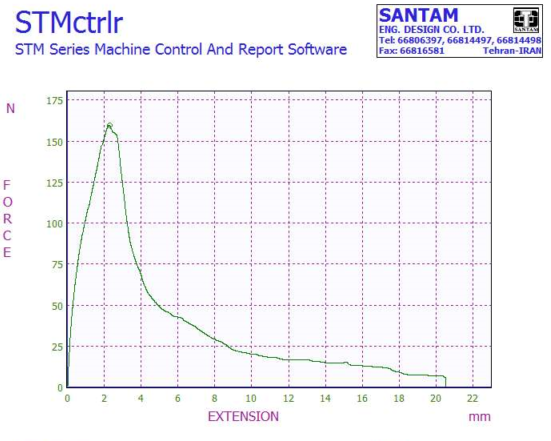


**Figure S21.** Lab shear diagram of HMPUR derived from PSPO-1 & MDI & BDO


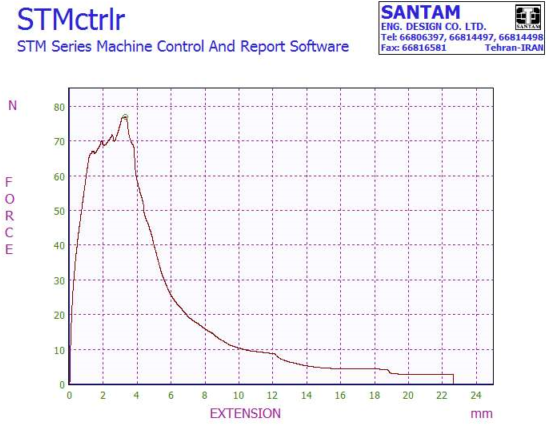


**Figure S22.** Lab shear diagram of HMPUR derived from PSPO-2 & MDI & EDA


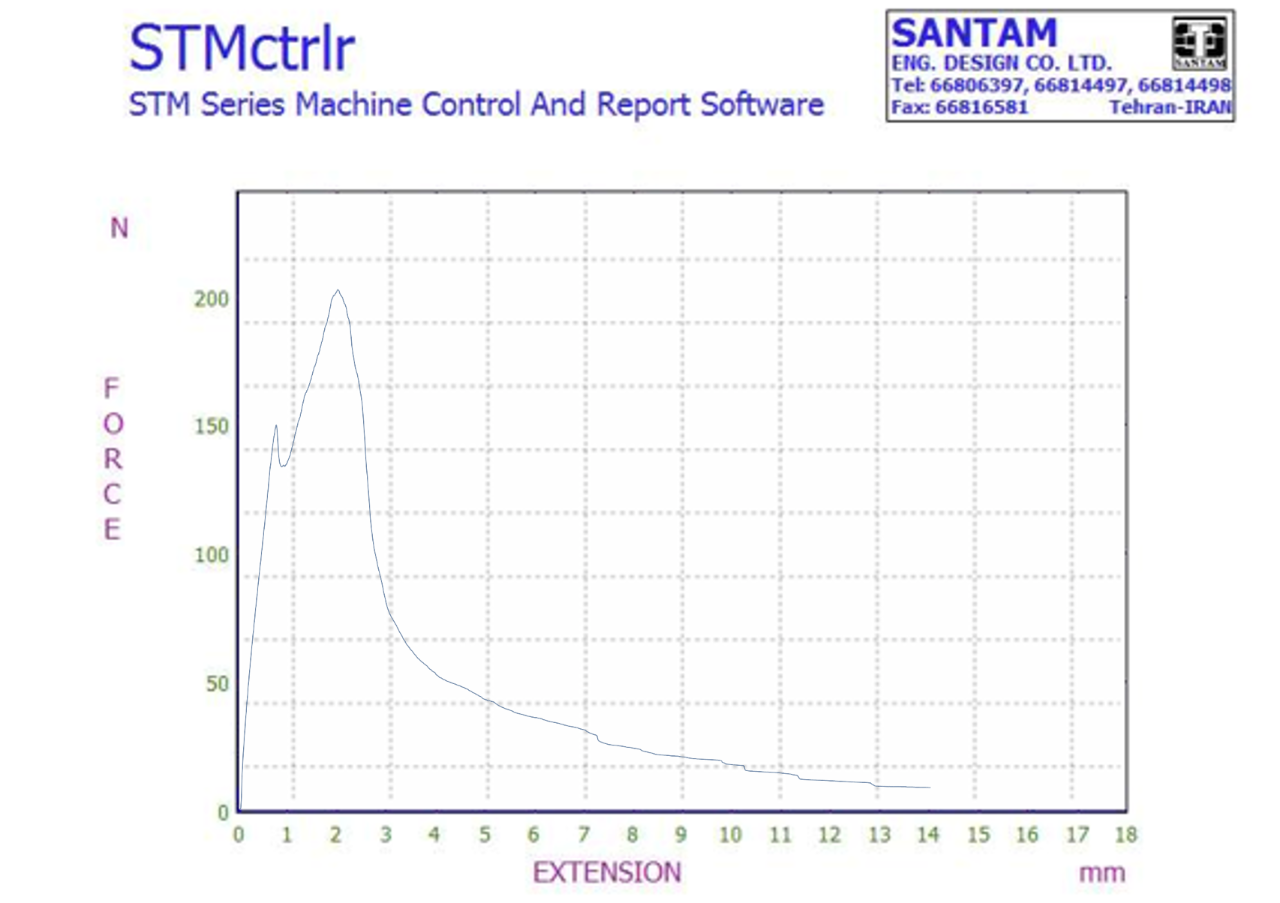


**Figure S23.** Lab shear diagram of HMPUR derived from PSPO-2 & MDI & BDO


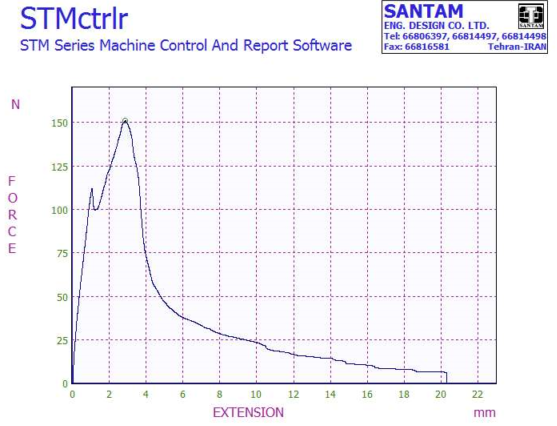


**Figure S24.** Lab shear diagram of HMPUR derived from PSPO-3 & MDI & EDA


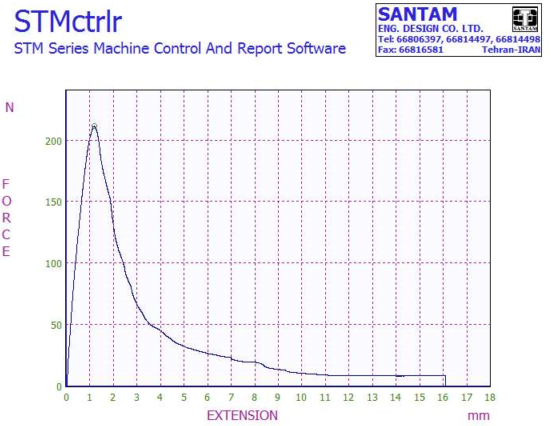


**Figure S25.** Lab shear diagram of HMPUR derived from PSPO-3 & MDI & BDO


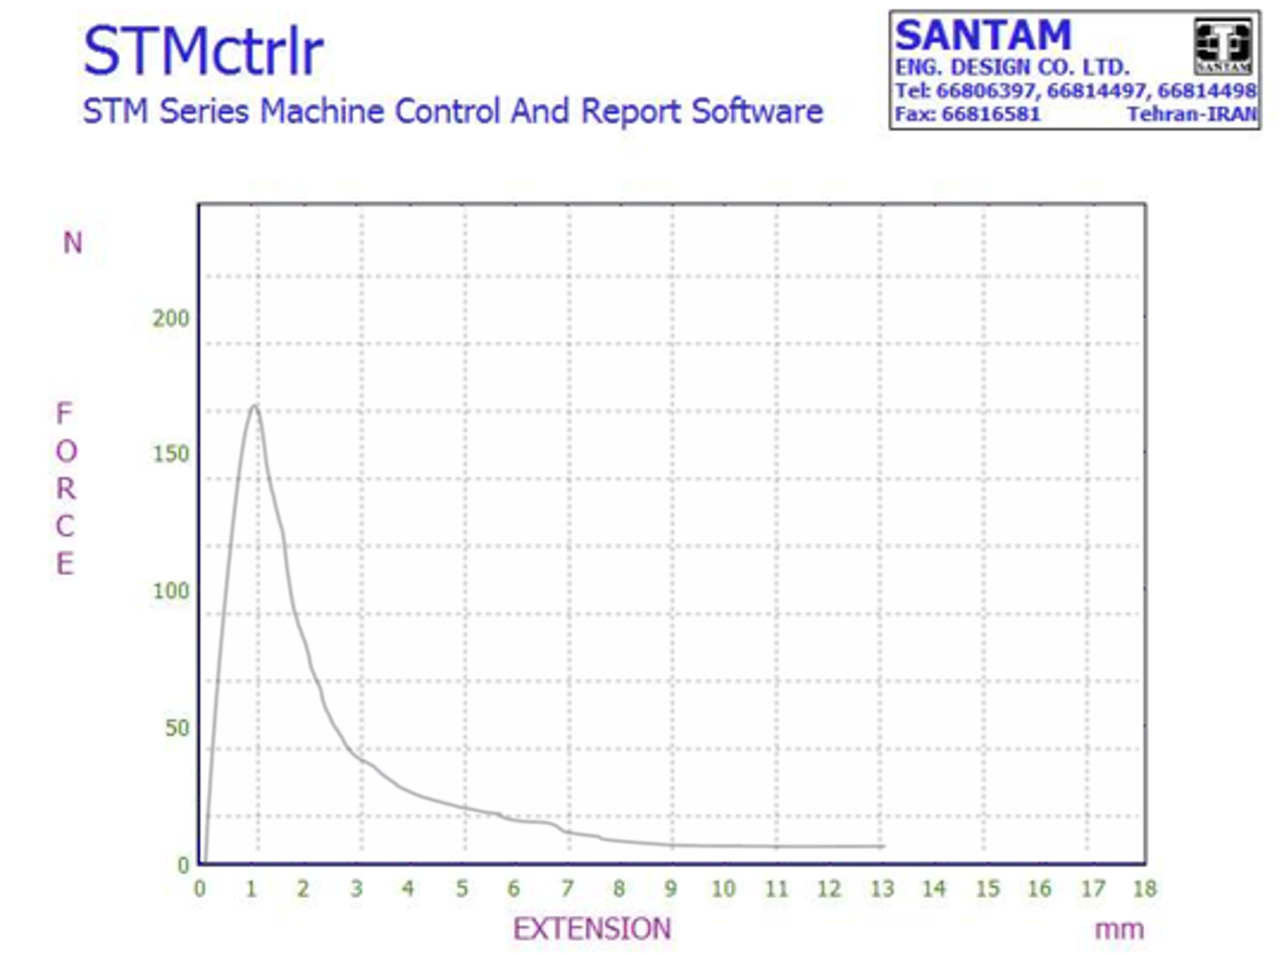


**Figure S26.** FT-IR spectrum of HMPUR derived from PSPO-3 & MDI & EDA


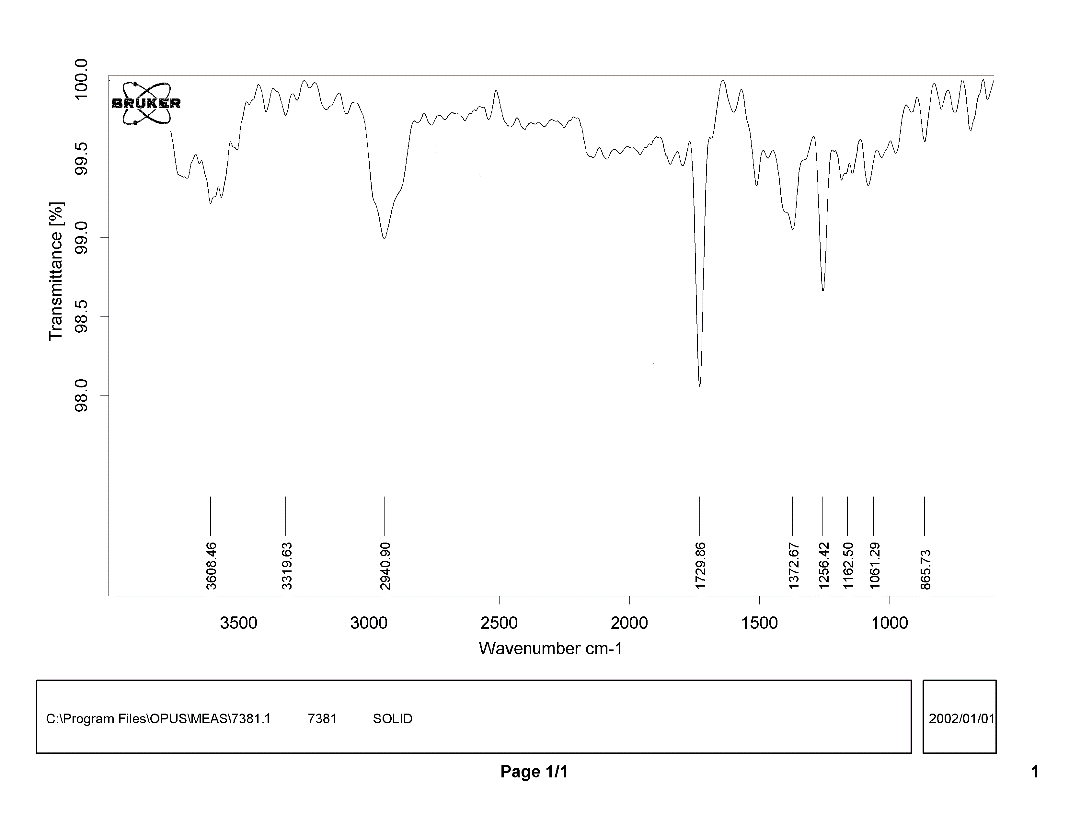


**Figure S27.** FT-IR spectrum of HMPUR derived from PSPO-3 & MDI & BDO


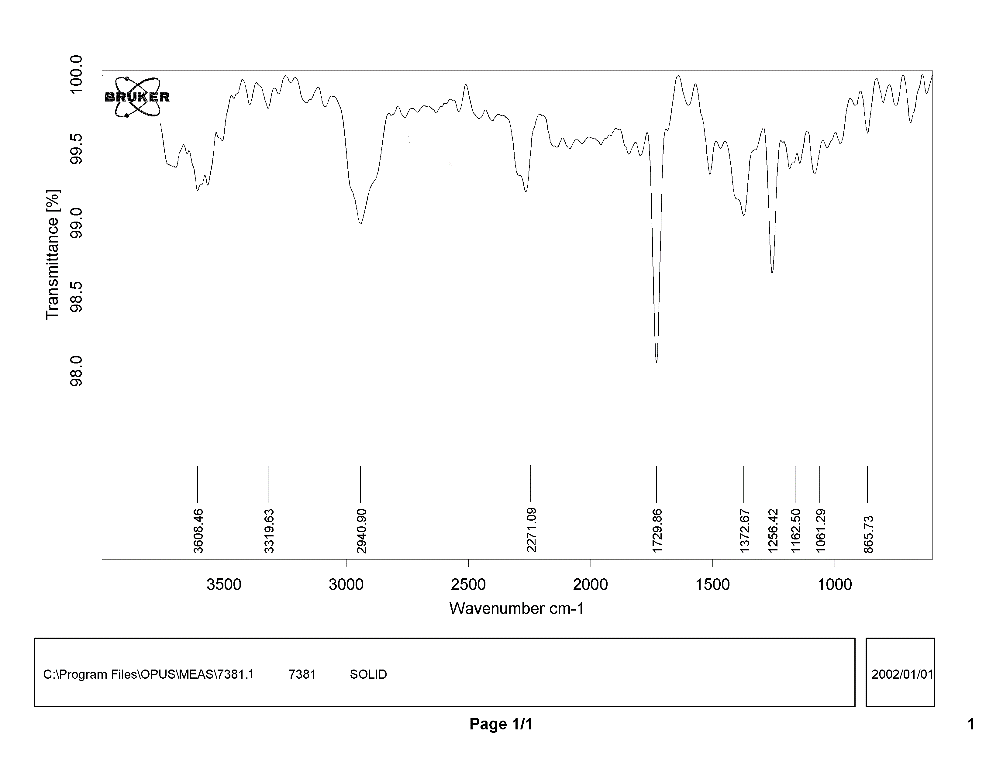

Supplement: Supplementary file 1 [file ce04852efb0a8102a87c93fa.docx]
